# Supplementary material
Source: PubMed Central journal article supplement (PMC1676147)
Supplement: bmj_333_7579_1153__1.pdf [file bmj_333_7579_1153__1.pdf]

### **Additional Supporting Web References [as supplied by authors]**

w1. Galvin JE, Hemric ME, Ward K, Cunningham MW. Cytotoxic mAb from rheumatic carditis recognizes heart valves and laminin. *J Clin Invest* 2000;106:217-24.

w2. Raizada V, Williams RC, Chopra P, Gopinath N, Prakash K, Sharma KB. Tissue distribution of lymphocytes in rheumatic heart valves as defined by monoclonal and anti-T cell antibodies. *Am J Med* 1983;74:90-6.

w3. Pruksakorn S, Sittisombut N, Phornphutkul C, Pruksachatkunakron C, Good MF, Brandt E. Epidemiological analysis of non-N-typeable group A Streptococcus isolates from a Thai population in northern Thailand. *J Clin Microbiol* 2000;38:1250-54.

w4. Carapetis JR, McDonald M, Wilson NJ. Acute Rheumatic Fever. *Lancet* 2005; 366:155-68.

w5. National Heart Foundation of Australia (RF/RHD guideline development working group) and the Cardiac Society of Australia and New Zealand. Diagnosis and management of acute rheumatic fever and rheumatic heart disease in Australia – an evidence based review 2006.

[http://www.heartfoundation.com.au/downloads/ARF\\_RHD\\_PP-590\\_Diag-Mgmt\\_Evidence-Review0606.pdf](http://www.heartfoundation.com.au/downloads/ARF_RHD_PP-590_Diag-Mgmt_Evidence-Review0606.pdf)

w6. Gentles TL, et al. Left ventricular mechanics during and after acute rheumatic fever.: contractile dysfunction is closely related to valve regurgitation. *JACC* 2001;37910: 201-7.

w7. Essop MR, Wisenbaugh T, Sareli P. Evidence against a myocardial factor as the cause of left ventricular dilatation in active rheumatic carditis. *JACC* 1993;22:826-9.

w8. Derrick CW, Dillon HC. Erythromycin therapy for streptococcal pharyngitis. *Am J Dis Child* 1976;130:170-8.

w9. Pichichero ME, Margolis PA. A comparison of cephalosporins and penicillin in the treatment of group A streptococcal pharyngitis: a meta-analysis supporting the concept of microbial copathogenicity. *Pediatr Infect Dis J* 1991;10:275-81.

w10. Seppala H, Nissinen A, Jarvinen H, et al. Resistance to erythromycin in Group A streptococci. *New Engl J Med* 1992; 326:292-7.

w11. Principi N, Marchisio P. Incidence of severe streptococcal-related disease in Italian children in an era of high group A streptococcal resistance to macrolides. Italian Group A Streptococcal Resistance to Macrolides Study Group. *J Chemother* 1999;11:379-84.

w12. Park H-S, Cleary PP. Active and passive intranasal immunizations with streptococcal surface protein C5a peptidase prevent infection of murine nasal mucosa-associated lymphoid tissue, a functional homologue of human tonsils. *Infect Immun* 2005;73:7878-86.
